# Supplementary material
Source: PubMed Central journal article supplement (PMC4033633)
Supplement: ac5006926_si_001.pdf [file ac5006926_si_001.pdf]

# Quantification of High-Resolution $^1\text{H}$ - $^{13}\text{C}$ NMR Spectra from Rat Brain Extracts

Robin A. de Graaf, Golam M. I. Chowdhury, Kevin L. Behar

## ABSTRACT

NMR spectroscopy in combination with  $^{13}\text{C}$ -labeled substrate infusion is a unique technique to obtain information about dynamic metabolic fluxes non-invasively *in vivo*. In many cases the *in vivo* information content obtained during dynamic  $^{13}\text{C}$  studies in rodents can be enhanced by high-resolution  $^1\text{H}$ - $^{13}\text{C}$  NMR spectroscopy on brain extracts. Previously it has been shown that  $^1\text{H}$  NMR spectra from rat brain extracts can be accurately quantified with a spectral fitting routine utilizing simulated basis sets using complete prior knowledge of chemical shifts and scalar couplings. The introduction of  $^{13}\text{C}$  label into the various metabolites presents complications that demand modifications of the spectral fitting routine. As different multiplets within a given molecule accumulate various amounts of  $^{13}\text{C}$  label, the fixed amplitude relationship between multiplets typical for  $^1\text{H}$  NMR spectra must be abandoned. In addition,  $^{13}\text{C}$  isotope effects lead to spectral multiplet patterns that become dependent on the amount of  $^{13}\text{C}$  label accumulation, thereby preventing the use of a common basis set. Here a modified spectral fitting routine is presented that accommodates variable  $^{13}\text{C}$  label accumulation and  $^{13}\text{C}$  isotope effects. Spectral fitting results are quantitatively compared to manual integration on column-separated samples in which spectral overlap is minimized.

## TABLE OF CONTENTS

Figure S1. Metabolic model of glycolysis and the tricarboxylic acid (TCA) cycle.

Table S1.  $^{13}\text{C}$  fractional enrichments obtained with integration and spectral fitting.

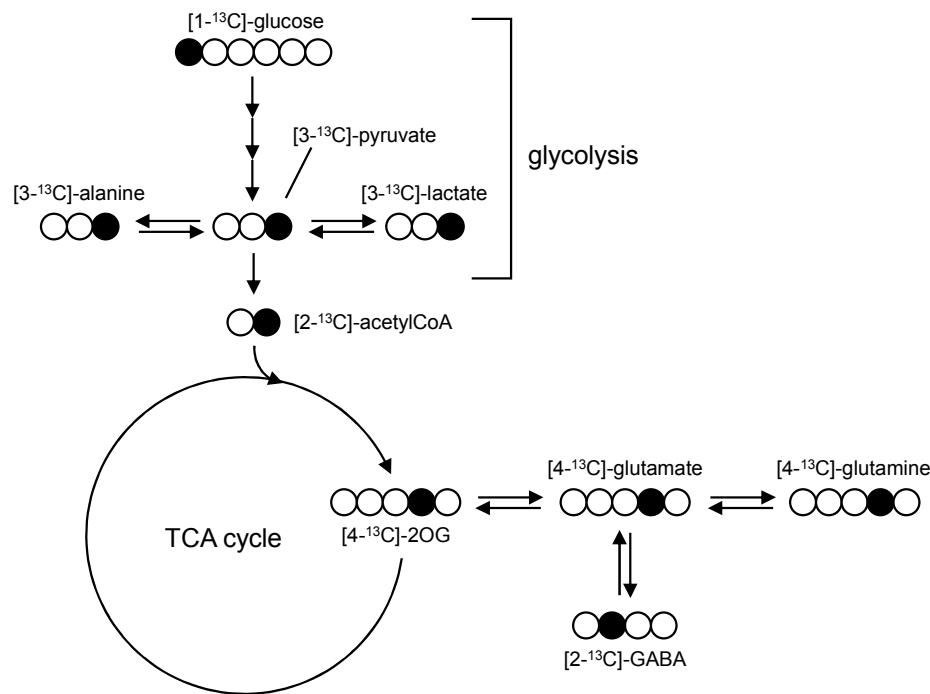

Figure S1. Metabolic model of glycolysis and the tricarboxylic acid (TCA) cycle. Small circles correspond to carbon atoms, whereby filled circles indicate  $^{13}\text{C}$  labeled positions. When  $[1-^{13}\text{C}]$ -glucose is used as the substrate, the  $^{13}\text{C}$  label is transferred via the glycolytic pathway to  $[3-^{13}\text{C}]$ -pyruvate. Pyruvate is in fast exchange with alanine and lactate, both of which are detectable by  $^1\text{H}$  and  $^1\text{H}-[^{13}\text{C}]$  NMR spectroscopy. The  $^{13}\text{C}$  label enters the TCA cycle when  $[2-^{13}\text{C}]$  acetyl CoA condenses with oxaloacetate to form  $[2-^{13}\text{C}]$ -citrate. After three additional TCA cycle steps the  $^{13}\text{C}$  label arrives in 2-oxoglutarate (2OG) which is in fast exchange with the large, NMR detectable pool of glutamate. During the first turn of the TCA cycle  $[4-^{13}\text{C}]$ -glutamate is formed. Subsequent turns lead to the formation of  $[2-^{13}\text{C}]$  and  $[3-^{13}\text{C}]$ -glutamate. In the brain the excitatory neurotransmitter glutamate can be converted to glutamine via the glutamate-glutamine neurotransmitter cycle or to the inhibitory neurotransmitter  $\gamma$ -amino butyric acid (GABA). The metabolic model shown is in essence a one-compartment model. In many applications related to cerebral metabolism the model is extended to four compartments encompassing blood, astroglia, glutamatergic neurons and GABAergic neurons.

Table S1: Carbon-13 fractional enrichments as determined by spectral fitting of non-separated or by integration of column-separated brain extract samples<sup>1</sup>.

| infusion time (min) | 15                  | 15                  | 30                  | 60                  | 60                  |
|---------------------|---------------------|---------------------|---------------------|---------------------|---------------------|
| multiplet           | integration/fitting | integration/fitting | integration/fitting | integration/fitting | integration/fitting |
| Asp-H3              | 15.2 / 14.6         | 16.1 / 19.2         | 20.2 / 22.4         | 27.4 / 26.1         | 36.6 / 36.9         |
| Ala-H3              | 26.9 / 28.2         | 30.8 / 30.4         | 30.9 / 32.2         | 37.9 / 36.6         | 32.1 / 33.6         |
| Lac-H3              | 27.2 / 27.0         | 32.1 / 33.9         | 30.8 / 28.3         | 36.7 / 37.6         | 34.4 / 34.8         |
| Gln-H3              | 5.4 / 5.4           | 5.1 / 5.4           | 8.7 / 10.5          | 19.5 / 20.1         | 17.5 / 18.2         |
| Gln-H4              | 12.0 / 11.5         | 11.9 / 12.3         | 20.3 / 19.1         | 32.2 / 33.2         | 25.7 / 24.2         |
| Glu-H3              | 8.6 / 8.9           | 8.7 / 8.9           | 16.8 / 16.5         | 27.2 / 27.0         | 29.6 / 27.0         |
| Glu-H4              | 26.9 / 26.0         | 25.8 / 26.2         | 34.0 / 32.6         | 38.6 / 37.9         | 37.1 / 37.2         |
| GABA-H2             | 20.4 / 19.1         | 18.3 / 18.7         | 27.2 / 24.0         | 37.2 / 36.6         | 35.5 / 32.8         |
| GABA-H3             | 7.8 / 6.7           | 7.5 / 7.2           | 12.6 / 12.7         | 28.9 / 29.3         | 25.1 / 23.6         |

<sup>1</sup> Metabolite fractional enrichments are not corrected for <sup>13</sup>C blood glucose fractional enrichment.
